1 Title: Rare genetic variation is important for survival in extreme low pH conditions

2

3 Authors: Reid S. Brennan<sup>1,2</sup>, April D. Garrett<sup>1</sup>, Kaitlin E. Huber, Heidi Hargarten, Melissa H.

4 Pespeni<sup>2</sup>

5

6 Affiliation: Department of Biology, University of Vermont, Burlington, VT, USA

7

8 <sup>1</sup>Authors contributed equally to this work

9 <sup>2</sup>Corresponding authors

10 Email: Reid.Brennan@uvm.edu; mpespeni@uvm.edu

11

12 Running head: Low pH adaptation

13

14 Keywords: standing genetic variation; ocean acidification; adaptation; experimental evolution;

15 select and resequence; extreme events

16 **Abstract**

17       Population persistence through increasingly frequent extreme environmental fluctuations  
18 will require selection on standing genetic variation. While some species have shown the capacity  
19 to adapt to mean future conditions, the ability to survive and potentially adapt to extreme events  
20 is unknown. Here we used pooled capture sequencing to test for adaptive capacity and identify  
21 genetic variation responsive to moderate (pH 8.0) and extreme (pH 7.5) low pH conditions using  
22 single generation selection experiments on hundreds of thousands of *Strongylocentrotus*  
23 *purpuratus* sea urchin larvae generated from wild-caught adults. The single generation of  
24 selection showed consistent shifts in allele frequencies across replicate cultures and increased  
25 linkage disequilibrium around selected loci, revealing selective sweeps from standing variation.  
26 We found extreme pH selection targeted alleles at low frequency in the population while variants  
27 that responded to both moderate and extreme pH selection started at higher allele frequencies,  
28 suggesting maintenance by balancing selection. Variants with the greatest changes in allele  
29 frequencies performed functions related to lipid metabolism, pH tolerance, membrane  
30 trafficking, and regulation of actin/cytoskeleton dynamics. These results highlight that survival  
31 in extreme conditions relies on low frequency standing genetic variation that must be maintained  
32 by large population sizes.

33

## 34 **Introduction**

35           As temperatures increase and oceans become more acidic, many marine species are at  
36 high risk of decline and extinction [1]. In addition to changing global averages, the frequency  
37 and intensity of extreme events are also increasing [2]. With small or gradual changes in  
38 conditions, organisms may acclimate through physiological plasticity or migrate to suitable  
39 habitats where possible, but some amount of genetic adaptation will be necessary for continued  
40 population persistence, particularly in the context of extreme events [3]. Indeed, extreme events  
41 rather than average conditions set the physiological and biogeographic limits of individuals and  
42 populations [4-6]. Though limits set by rare extreme events will be critical for population  
43 persistence, the genetic mechanisms that could allow such rapid adaptation have rarely been  
44 explored [7].

45           Evolve or select & resequence, a type of experimental evolution, is particularly powerful  
46 and promising for understanding capacity to adapt to future conditions and extreme events. In  
47 this approach, one artificially induces the selective treatment and directly measures genetic  
48 response during adaptation [8-11]. While evolve and resequence studies typically leverage 15-20  
49 generations of selection [10,12], we have empirically found that adaptive genetic variation can  
50 be identified with a single generation of selection by using 1000s of small offspring generated  
51 from highly heterozygous, outbred parents collected from the wild [13].

52           The purple sea urchin, *Strongylocentrotus purpuratus*, is an ideal model for  
53 understanding the process of adaptation from adaptive standing genetic variation. This species is  
54 found on inter- and subtidal rocky reefs and kelp forests across a broad latitudinal range from  
55 Alaska to Baja California, Mexico in the California Current Marine Ecosystem (CCME). They  
56 experience high heterogeneity in environmental conditions in both time and space [14-16],  
57 increasing the likelihood of the presence of adaptive standing genetic variation [17-19]. Further,  
58 this species is a good system to understand the genetics of rapid adaptation due to large census  
59 and effective population sizes that contribute to high standing genetic variation [20,21]. While  
60 gene flow is high due to pelagically dispersing larvae, populations nevertheless show increased  
61 frequencies of variants putatively adaptive to local temperature and pH conditions [22]. Previous  
62 studies have shown that *S. purpuratus* larvae have the physiological and genetic capacity to  
63 adaptively respond to an acidifying ocean [13,15,23], but these studies have focused on relatively

64 mild conditions and have not investigated the capacity to respond to extreme pH conditions that  
65 are predicted to increase in frequency in the near future [2,24].

66 Here, we perform single generation selection experiments in moderate (pH 8.0) and  
67 extreme low (pH 7.5) pH conditions using purple sea urchin larvae generated from 25 wild-  
68 caught adults. We test the hypotheses that (1) there will be unique genetic variation responsive  
69 to extreme low pH conditions, and (2) that genomic patterns of variation, such as linkage  
70 disequilibrium and starting allele frequencies, will provide insight into the evolutionary  
71 mechanisms that maintain adaptive standing genetic variation for survival in moderate and  
72 extreme conditions, and (3) pooled sequencing of genomic DNA from larvae before and after  
73 treatments will show consistent changes in allele frequency across replicate cultures due to  
74 selective mortality through development.

75

## 76 **Methods**

### 77 *Sample collection & experiment:*

78 Purple sea urchin adults were collected in September 2016 from San Diego, CA, shipped  
79 overnight to the University of Vermont, and the experiment began immediately upon their arrival  
80 (n=25 total: 14 females and 11 males). Spawning was induced with 0.5M KCl in Instant Ocean  
81 artificial seawater (ASW) (Instant Ocean, Blacksburg, VA) at 14°C and salinity of 35ppt. For  
82 each female, 200,000 eggs were put into each treatment, moderate (pH 8.0) and extreme (pH 7.5)  
83 low pH, and fertilized by evenly pooled sperm from all males. We chose these pH conditions  
84 based on empirical data collected in the CCME. The current average open ocean and intertidal  
85 pH is 8.1, though conditions in the CCME frequently drop to pH 8.0 (daily), and only rarely drop  
86 as low as pH 7.5 (once in three month upwelling period; [14,16,24,25]). Fertilized eggs were  
87 pooled across all females by pH and seeded into four replicate culturing vessels per treatment  
88 (37,000 eggs per 3.7 L vessel). Developing embryos were sampled at day 1 and day 7 post  
89 fertilization for morphometric and genomic analyses. See the supplemental methods for  
90 expanded details.

91

### 92 *Morphometrics:*

93 7-day old 4-armed pluteus larvae were photographed for morphometric analysis using a  
94 Photometrics Scientific CoolSNAP EZ camera (Tuscon, AZ) connected to a Zeiss Axioscop 2

95 compound microscope (Jena, Germany). Larval body size data were analyzed in R [26] with a  
96 generalized linear mixed model in the package lme4 [27], with pH as a fixed effect and culturing  
97 vessel as a random effect. See the supplemental methods for expanded details.

98

99 *DNA sequencing, Mapping, & SNP-calling:*

100 DNA was extracted from pools of larvae for each day and replicate vessel using a Zymo  
101 ZR-Duet DNA/RNA MiniPrep Plus Kit (Zymo, Irvine, CA). High quality DNA was shipped to  
102 Rapid Genomics (Gainesville, FL) for library prep, capture, and sequencing. Following library  
103 generation, DNA libraries were captured with 46,316 custom probes. Probes were designed to  
104 capture two 120 base pair regions per gene: one within exon boundaries and one in putative  
105 regulatory regions. Barcoded samples were then pooled and sequenced using 100 bp paired-end  
106 sequencing on one lane of an Illumina HiSeq 3000.

107 Raw paired-end reads were quality trimmed and mapped to the *S. purpuratus* genome 3.1  
108 (build 7) with bwa mem [28]. Variants were identified using *mpileup* in Samtools and filtered for  
109 minor allele frequency (maf) of 0.01, quality greater than 20, bi-allelic SNPs only, and no  
110 missing data. Sequencing depth can influence the accuracy of allele frequency estimation, and  
111 we used only variants where each pool was sequenced to a depth of > 40x and with an average  
112 minimum depth across all pools > 50x, as recommended by Schlotterer et al. [29]. Mean  
113 maximum coverage cutoff was 372. Finally, we removed off target variants, which were defined  
114 as any variant greater than 2kb from a probe. This filtering process resulted in 77,449 variant  
115 sites. See supplemental methods for more details. Code for data processing and analyses can be  
116 found on our GitHub page: [https://github.com/PespeniLab/urchin\\_sel\\_ms\\_2018](https://github.com/PespeniLab/urchin_sel_ms_2018).

117

118 *Detecting changes in allele frequency:*

119 Cochran-Mantel-Haenszel (CMH) tests were conducted in R (*mantelhaen.test*) to identify  
120 significant shifts in allele frequency in response to pH treatment. CMH tests are a standard  
121 method of identifying changes in allele frequency in experimental evolution studies [10]. To  
122 identify consistent changes in allele frequency through developmental time, we compared allele  
123 frequency estimates for the four replicate samples from day 1 at pH 8.0 ( $T_0$ ) to the four replicate  
124 samples from day 7 at pH 8.0 and to the four replicate samples from day 7 at pH 7.5. P-values  
125 were corrected using the *qvalue* package in R [30]. These data could be affected by long range

126 linkage disequilibrium [31]; therefore, we take a conservative approach and consider q-values <  
127 0.001 significant.

128 A principal components analysis (PCA) was used to visualize relationships between  
129 allele frequencies of treatment replicates using the R package *pcadapt* [32]. We calculate  
130 nucleotide diversity for each treatment using a sliding window approach in Popoolation with the  
131 *variance-sliding* command [33]. Window size was set to 400 bp with step size of 200 bp.  
132 Distributions of nucleotide diversity were compared with a Kolmogorov-Smirnov test using the  
133 *ks.test* function in R.

134 Following a selective sweep, sites under selection should show a pattern of higher linkage  
135 disequilibrium (LD) than variants responding to drift alone. To test for this pattern, we compared  
136 LD estimates among pairs of SNPs across the genome for selected (CMH  $q < 0.001$ ) and neutral  
137 (non-selected, CMH  $q \geq 0.001$ ) variants using LDx [34] (supplemental methods). LDx uses a  
138 maximum likelihood approach and leverages haplotype information of SNPs present on single  
139 reads to estimate LD between pairs of variants. An exponential decay model was fit to each  
140 group of LD estimates using the R package *nls* [35]. To assess whether the levels of LD present  
141 in selected sites could be due to the lower number of variants than is present in neutral sites, we  
142 randomly subsampled all variants 500 times to match the number of selected loci and compare  
143 these decay curves to the observed decay in LD using a Kolmogorov-Smirnov test.

144 To assess the distribution of starting allele frequencies of adaptive loci, selected loci were  
145 polarized by the frequency of the allele increasing in frequency in response to pH selection (i.e.,  
146 the putative adaptive allele). Neutral loci ( $q \geq 0.001$ ) were polarized in the same way, though this  
147 is a random assignment given the lack of a significant shift in frequency. To ensure the patterns  
148 observed were not a byproduct of the CMH statistic having the greatest power to identify  
149 variants at low starting allele frequencies, the observed allele frequency distributions were  
150 compared to permuted distributions with no true biological signal as described in the  
151 supplemental methods.

152 Gene ontology (GO) enrichment was performed using the weight algorithm in topGO  
153 version 2.22.0 [36]. GO terms for each gene were retrieved from EchinoBase  
154 (<http://www.echinobase.org/>). Enrichment tests were conducted for each set of significant  
155 variants and genes that had any SNPs in genic or intergenic regions were considered the target  
156 set. Any gene with multiple significant variants was only considered once.

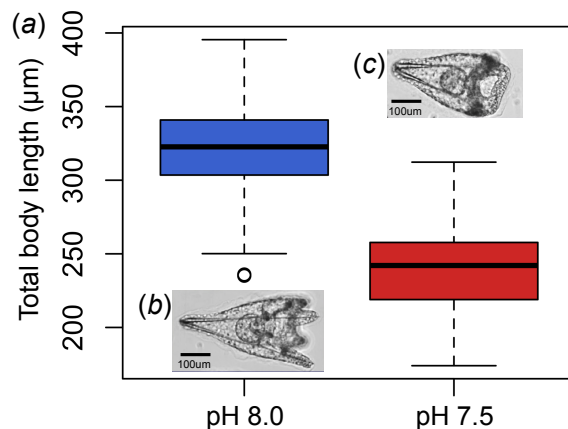

**Figure 1:** Morphometric analysis of total larval body length. (a) Boxplot of body size in each selection regime. Inset pictures show representative individuals found in pH 8.0 (b) and 7.5 (c).

157

## 158 Results

159

### 160 *Morphometrics*

161 Mean total larval body length was significantly lower in pH 7.5 (mean  $\pm$  standard error:  
162  $239.1 \pm 3.1$  micrometers) as compared to pH 8.0 ( $320.9 \pm 2.9$  micrometers) (Fig. 1a,  $P < 0.001$ ).

163 Overall, larvae in the extreme low pH treatment were more stunted, with smaller bodies and  
164 spines compared to moderately low pH conditions (Fig. 1b-c). These results suggest that  
165 physiological and selective impact was stronger in pH 7.5 than pH 8.0. While we were unable to  
166 measure mortality with these data, estimates from other experiments in our lab show  
167 30% survival in ambient (pH 8.1) conditions and 10% survival in extreme low (pH 7.5)  
168 conditions after 7 days.

169

### 170 *Consistent allele frequency changes among replicate selection lines*

171 We identified 75,368 variable sites present in or near 9,828 genes. 1,078 variants (in 816  
172 genes) showed consistent changes in allele frequency (AF) in response to selection at pH 7.5 and  
173 724 variants (in 579 genes) in response to pH 8.0 (CMH,  $q < 0.001$ ; see Table S1 for a summary  
174 of results). 177 (11%) of these significant variants overlapped (in 144 genes, which is 11% of  
175 unique genes). However, assessing the overlap of genes that had loci targeted by selection, rather  
176 than overlap of specific variants, 205 genes overlapped (17% of unique genes). Overall, 2% of

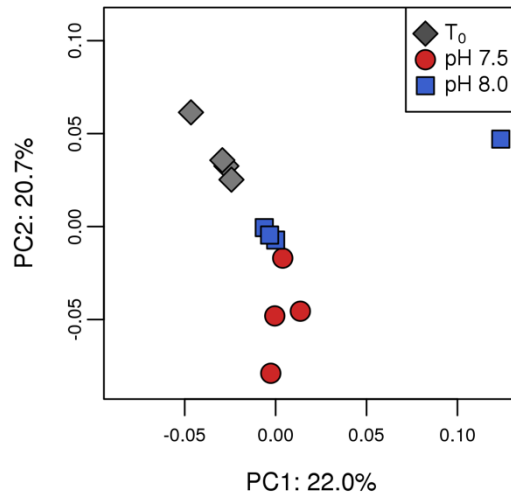

**Figure 2:** Principal component analysis of allele frequencies for all 75,368 SNPs at time point zero (T<sub>0</sub>) and after seven days in the two the pH treatments.

177 variants surveyed (1,625/77,449) and 12% of genes surveyed (1,200/9,828) were identified as  
178 responsive to one or both pH treatments at  $q$ -value  $< 0.001$ .

179 Of the total assayed variants, 50,686 (67%) were in genic regions while 24,677 (33%)  
180 were in intergenic regions. Matching expectations of chance sampling, for pH 7.5 selected loci,  
181 725 (67%) were genic and 353 (33%) were intergenic (chi square,  $P > 0.05$ ). Similarly, pH 8.0  
182 selected loci consist of 506 (70%) genic and 218 (30%) intergenic loci (chi square,  $P > 0.05$ ).  
183 Given the rapid decay in linkage disequilibrium (see below), these results suggest that there are  
184 both important coding and putative regulatory pH-responsive loci segregating in populations.

185 Principal component analysis (PCA) showed that the variance in allele frequencies  
186 among larvae sampled from replicate culture vessels clustered by day and treatment (Fig. 2). pH  
187 7.5 samples show the largest shift from the starting allele frequencies as expected with increased  
188 selective mortality due to treatment. Note that one of the D7 pH 8.0 samples was an outlier. To  
189 ensure that this sample did not artificially reduce power, we removed this sample and down  
190 sampled all replicates to  $n=3$ , and reran the CMH test. We found the same relative numbers of  
191 significant variants for both pH treatments.

192

### 193 Signals of shared and pH-specific selection

194 Patterns of LD among loci showed the highest LD between SNP pairs involving pH 7.5  
195 loci, followed by pH 8.0 selected loci. Further, both sets of selected loci had higher LD than the



196 neutral expectation and putatively neutral sites matched genome wide expectations when  
197 controlling for the number of variants sampled (Fig. 3 and Fig. S1). We observed rapid decay of  
198 LD within 200 base pairs, which is expected given the high levels of genetic diversity, large  
199 effective population size, high fecundity, and high gene flow of this species.

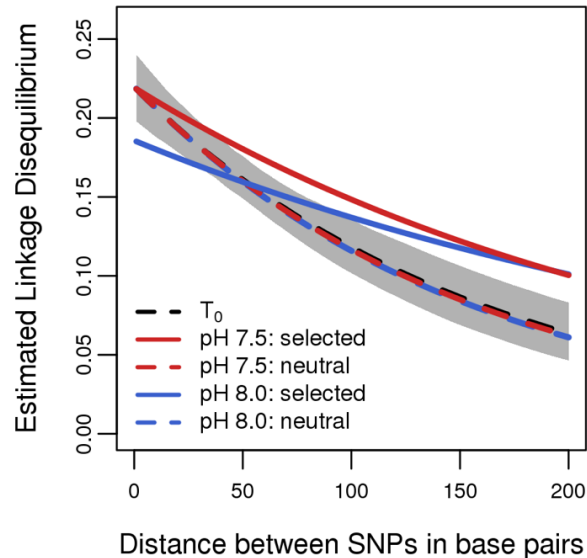

**Figure 3:** Decay in linkage disequilibrium with physical distance between SNP pairs. Dashed lines are neutral loci and solid red and blue lines represent decay in pH 7.5 and 8.0 selected variants, respectively. Solid grey shading is the 95% distribution of 500 permutations of down sampled random variants across the genome (see text for details).

200 Shifts in allele frequency showed unique and shared signals between pH selection  
201 regimes (Fig. 4a, S2). Significant loci specific to pH 7.5 show a correlation in average allele  
202 frequency change of 0.68 with their non-significant pH 8.0 counterparts ( $P < 0.001$ ) suggesting  
203 that the same loci were responding to treatment though to a lesser degree in pH 8.0; pH 8.0  
204 significant loci reveal the same pattern with a correlation of 0.69 ( $P < 0.001$ ). As expected, loci  
205 that were identified as significant in both treatments showed the strongest correlation in allele  
206 frequency change ( $r^2 = 0.87$ ,  $P < 0.001$ ). Interestingly, the loci with the most extreme shifts in  
207 allele frequency were significant in both selection regimes (upper right quadrant of Fig. 4a, Fig.  
208 S3).

209 To understand how variants are segregating and maintained in populations, we explored  
210 the starting allele frequencies ( $T_0$ ) for loci identified as responsive to pH 7.5, pH 8.0, and in both  
211 treatments (Fig. 4b). All three sets of selected loci had significantly lower starting allele  
212 frequencies than neutral loci (KS test,  $P < 0.001$ ). Loci responsive to the most extreme selection

213 regime, pH 7.5, had significantly lower starting allele frequency than loci responsive pH 8.0 (KS  
214 test,  $P < 0.05$ ) and than loci responsive to both pH treatments (KS test,  $P < 0.1$ ). Loci responsive  
215 to just pH 8.0 and to both treatments had similar distributions of starting allele frequency (KS  
216 test,  $P = 0.38$ ). We also compared observed allele frequency distributions of selected loci to the  
217 allele frequency distributions of the same number of randomly sampled loci across the genome  
218 (Fig. 4B, S4). The allele frequency distribution for all three groups of selected variants were  
219 significantly different from all 1000 randomly sampled distributions (KS tests,  $P < 0.001$ ).  
220 Lastly, we randomly shuffled sample IDs and compared starting allele frequencies of observed  
221 and permuted “selected” loci. These permutations showed that the CMH statistic was not biased  
222 towards loci that started at low frequencies (Fig. S5). These results suggest that loci underlying  
223 low pH adaptation are rare in the starting population and more severe selection targets less  
224 common variants. However, loci responsive to both pH treatments are more common than pH-  
225 specific loci.

226 This overall pattern an excess of low allele frequency variants among selected loci is  
227 consistent across functional classes of variants (non-synonymous, synonymous, intronic,

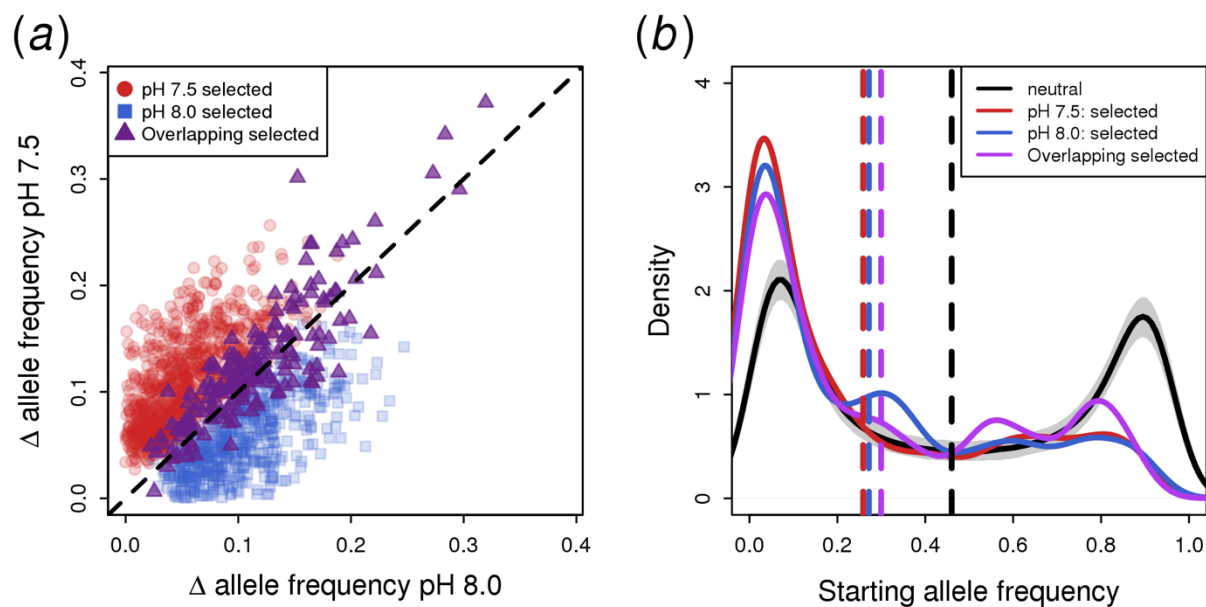

**Figure 4:** (a) Mean change in allele frequency for variants showing significant shifts under pH 7.5 and 8.0. Dashed black line represents the 1:1 expectation. (b) Allele frequency at  $T_0$  polarized by the allele increasing in frequency during selection. Colored solid lines are the density plot distributions for each set of selected loci. The solid black line represents the median expectation of neutral loci from 1000 permutations of down sampling to the same number of variants as selected loci; grey shading is the 95% distribution of the permutation. Dashed vertical lines are the mean allele frequencies of each set of variants.

228 intergenic; Fig. S6). Low starting allele frequencies of responsive variants could suggest that  
229 surviving offspring were from a single parent. However, this is unlikely to be the case due to the  
230 rapid decay of linkage disequilibrium for selected loci relative to neutral loci. In addition, the  
231 large number of responsive loci and genes suggests that survival in low pH conditions is a highly  
232 polygenic trait, thus it is unlikely that surviving offspring had all the adaptive alleles from a  
233 single parent.

234 Genetic diversity at  $T_0$  was 0.0158 and 0.0129 and 0.0128 after seven days at pH 8.0 and  
235 7.5, respectively. Both pH selection regimes resulted in a decrease in genetic diversity compared  
236 to  $T_0$  (KS test,  $P < 0.001$ ). The decrease in diversity between the pH treatments was not different  
237 (KS test,  $P = 0.27$ ), demonstrating that, while the selection regimes were of different magnitude,  
238 the relative loss of genetic diversity through time was similar.

239 Functional enrichment analysis revealed that genes under selection were enriched for  
240 specific biological functions (Table S2). We observed enrichment for 19, 12, and 10 biological  
241 processes GO terms for pH 7.5, pH 8.0, and overlapping variants, respectively. Of these, only  
242 hexose metabolic process (GO:0019318) was significant across all three variant sets. Other  
243 related terms shared across sets included those involved in mitotic damage control (GO:0044818;  
244 GO:0007095; GO:0044774), cell growth (GO:0007099; GO:0030307; GO:0032467),  
245 metabolism and energy production (GO:0001678; GO:0009267; GO:0019318; GO:0006096).

246

## 247 **Discussion**

248 We show that genetic response to moderate and extreme low pH relies on both shared  
249 and unique mechanisms and that rare variants are important for survival in extreme low pH  
250 conditions while common (intermediate frequency) variants are important for survival in both  
251 moderate and extreme low pH regimes. Patterns of linkage disequilibrium and starting allele  
252 frequencies suggest that both neutral and selective processes maintain adaptive variants in  
253 natural populations. We further demonstrate the utility of single generation selection experiments  
254 to identify the genetic basis of adaptation, which is particularly useful for testing capacity for  
255 response to conditions that will be chronic in the future but are not so in nature today. Using  
256 sequence capture of genomic DNA, we quantified shifts in allele frequency that represent  
257 differential survival of genotypes during low pH selection in sea urchins. This approach has wide  
258 potential application for identifying responsive genetic variants from wild populations. Our

259 results highlight that neutral standing genetic variation maintained with large population sizes  
260 will be critical for survival in extreme environmental conditions.

261

### 262 *Detecting adaptive loci from standing genetic variation*

263 In the short term, a selective sweep results in decreased variation and increased LD, both  
264 of which can be leveraged to identify adaptive genomic regions [37,38]. Our results reveal an  
265 increase in LD in regions surrounding putatively adaptive loci, and the permutation shows that  
266 this increase in LD is not a byproduct of our test statistic or sampling noise (Fig. 3, S1). This  
267 provides confidence that our approach identifies genomic regions that are true targets of  
268 selection. In addition, because the experimental design relies on selection on standing genetic  
269 variation where loci will be present on multiple haplotypes, selective sweeps will retain ancestral  
270 variation, soft sweeps, and signals are expected to be weaker than a hard sweep [18,39,40].

271 Typical evolve and resequence studies rely on multiple generations of selection to  
272 identify adaptive shifts in allele frequency. However, a single generation selection can be  
273 leveraged for organisms with high fecundity and small offspring, which is particularly useful for  
274 long-lived organisms. This approach is unique and has benefits over standard experimental  
275 evolution. First, one starts with outbred wild-caught individuals, which will increase starting  
276 genetic diversity relative to inbred lab strains or isofemale lines [12,41,42]. Inference is limited  
277 to the genetic diversity present in the starting individuals and may miss variation present at  
278 different points in space or time and will miss the potential of new beneficial mutations. For  
279 organisms with large effective population sizes and high mutation rates, new adaptive mutations  
280 may be an important mode for adaptation [18]. However, starting with outbred parents  
281 maximizes the amount of recombined genetic variation, avoids large linkage blocks, which can  
282 plague experimental evolution studies from lab lines, and thereby improves the chances of  
283 identifying selected loci. Moreover, generating a large amount of offspring from all crosses of  
284 many parents creates a vast number of uniquely recombined genotypes upon which selection can  
285 act. Finally, because offspring are small, it is possible to subject replicates of thousands of  
286 individuals to selection, which is not possible with less fecund species with larger offspring.

287 The lack of genomic resources can limit the utility of a sequence capture approach for  
288 non-model organisms. One solution is to utilize resources from closely related species.

289 Alternatively, it is possible to use a transcriptome rather than whole genome for probe design or

290 to utilize expressed exome capture [43]. While this does not allow for the design of probes in  
291 promoter regions, it is typically available at a lower cost than whole genome sequencing.  
292 Previous work in the purple sea urchin has used pooled RNA-sequencing data to identify  
293 potentially adaptive genes and shifts in allele frequencies consistent among replicate pools within  
294 pH treatments [13]. We find in the present study that allele frequencies estimated based on RNA  
295 and genomic DNA from the same pooled larval samples are highly correlated ( $r^2 = 0.93$ ,  $P <$   
296  $0.001$ ; Fig. S7), demonstrating that RNA-seq is a viable option for generating allele frequency  
297 estimates.

298

### 299 Maintenance of adaptive standing genetic variation

300 Variants that respond to extreme low pH treatment are present in the starting population  
301 ( $T_0$ ) at low allele frequencies relative to neutral alleles (Fig. 4B). This pattern suggests that these  
302 adaptive variants are not maintained by balancing selection or overdominance, but rather by one  
303 of three processes. First, these alleles may be beneficial under extreme low pH conditions but  
304 neutral or slightly deleterious at ambient conditions, known as conditional neutrality [44].  
305 Alternatively, antagonistic pleiotropy can alter the rank fitness of alleles across different  
306 environments, thus maintaining genetic variation across space or time [45]. Finally, purple sea  
307 urchins are distributed along the west coast of North America from Alaska to Baja California,  
308 Mexico [21,46] where pH conditions vary due to natural processes such as upwelling, and  
309 populations have putative adaptive genetic variation associated with local pH conditions [22].  
310 High gene flow results in extensive transfer of genetic variation across the geographic range and  
311 migration-selection balance can result in the maintenance of low frequency alleles that are not  
312 adaptive in a local environment [47]. Similar results have been observed in *D. melanogaster*  
313 during experimental evolution to high temperature where allele frequencies of adaptive loci were  
314 shifted towards low starting values [31]. Interestingly, this low shift was only observed for  
315 adaptation to high but not low temperature, providing additional evidence that the CMH statistic  
316 is not inherently biased towards low starting minor allele frequencies.

317 Interestingly, loci responsive to both moderate and extreme pH treatments had higher  
318 starting allele frequencies than those responsive to extreme low pH alone (Fig. 4B). These “low-  
319 pH-essential” alleles may be maintained at higher allele frequency due to balancing selection in  
320 the wild. That is, the spatial and temporal heterogeneity of pH conditions experienced by purple

321 sea urchins across the species range and across their life history stages likely maintains these  
322 alleles at intermediate frequencies through fluctuating selection or spatially balancing selection  
323 [48]. We should note that these shared loci may also include variants involved in selection for  
324 the general lab culture conditions. While the experimental design of this study precludes the  
325 isolation of lab-adaptation variants, the concordance of functional classes of genes previously  
326 identified as responsive to moderate low pH conditions (pH 7.8) in purple sea urchin larvae  
327 generated from multiple populations [13,22] suggests that lab selection is unlikely to affect  
328 general results, patterns, or conclusions in the present study.

329

### 330 *Mechanisms for response to low pH conditions*

331 Numerous biological processes related to maintaining homeostasis in low pH conditions  
332 are overrepresented among selected loci. Across all sets of selected variants, we observe  
333 enrichment in processes related to metabolism and energy production (GO:0001678,  
334 GO:0009267, GO:0009061, GO:0019318, GO:0006096). Alterations to metabolic processes,  
335 energy demands, and allocation are a primary response to low pH environments [49,50] and  
336 previous *S. purpuratus* transcriptomic work has shown that this class of genes is differentially  
337 regulated in response to low pH stress [15,51]. The production of calcium carbonate (CaCO<sub>3</sub>)  
338 generates excess protons that must be removed to maintain acid-base balance, and under acidic  
339 conditions and under low pH conditions the energy required for acid-base regulation is increased  
340 [50]. We also see shared enrichment for genes involved in cell proliferation and damage control,  
341 including those implicated in cell growth and replication (GO:0030307, GO:0032467,  
342 GO:0007099, GO:0006272), replication checkpoints (GO:0044818, GO:0044774, GO:0000076,  
343 GO:0007095, and protein transport (GO:0046825, GO:0006606). These results match our  
344 morphometric results of stunted larval growth and suggest that fine control of cellular growth  
345 may be important for survival in low pH conditions. Two genes of interest that showed changes  
346 in allele frequency greater than 20% in both pH treatments included ELMOD2 (SP-ELMOD2,  
347 SPU\_007564), the locus with the highest changes in allele frequency in both treatments, and  
348 Focadhesin (KIAA1797, SPU\_015184), a gene with three SNPs, two of which change amino  
349 acids (upper right quadrant of Fig. 4a). ELMOD2 plays an important role in regulating  
350 membrane traffic and secretion, phospholipid metabolism, and actin/cytoskeleton dynamics [52-  
351 54] while Focadhesin is an important protein in subcellular structures as it integrates and receives



352 biomechanical and biochemical signals between the cytoskeleton and the extracellular matrix  
353 [55,56].

354 In addition to shared responses, pH 7.5 selection, the edge of what these organisms  
355 experience in nature, revealed unique adaptive targets to extreme pH selection. We observe  
356 enrichment for ‘actin polymerization or depolymerization’ (GO:0008154). It has been  
357 hypothesized that changes in actin abundance are related to cytoskeleton remodeling due to  
358 intracellular stress during acclimation of oysters to climate change conditions [57,58]. Evans et  
359 al., (2017) find enrichment for expression of genes involved in actin folding in *S. purpuratus*,  
360 suggesting that the cytoskeleton is a target of pH stress. There is also enrichment for vacuolar  
361 acidification (GO:0007035) which includes a H<sup>+</sup> transporting V-type ATPase (SPU\_016993). V-  
362 type ATPase regulate the pH of cellular compartments and can help maintain pH homeostasis  
363 when extracellular pH is altered [59].

364 Finally, we identify TASK2 (SPU\_003613) as under selection at pH 7.5 (Fig. 5). TASK2  
365 is a pH sensitive K<sup>+</sup> transporter [60] and is an important component of bicarbonate (HCO<sub>3</sub><sup>-</sup>)  
366 uptake in mouse kidney [61]. In this mammalian system, HCO<sub>3</sub><sup>-</sup> uptake occurs using a Na<sup>+</sup> co-  
367 transporter where Na<sup>+</sup> gradients are maintained by Na<sup>+</sup> excretion through Na<sup>+</sup>/K<sup>+</sup>-ATPases,  
368 resulting in the buildup of intracellular K<sup>+</sup>. Alkalinization from HCO<sub>3</sub><sup>-</sup> activates TASK2 which  
369 exports K<sup>+</sup> and re-establishes membrane polarization. HCO<sub>3</sub><sup>-</sup> transport in urchin larvae is  
370 similarly driven by a Na<sup>+</sup> co-transporter and Na<sup>+</sup> gradients are maintained by Na<sup>+</sup> excretion using  
371 Na<sup>+</sup>/K<sup>+</sup>-ATPases [50]; it is possible that TASK2 is also involved in the urchin uptake process.  
372 Under extreme pH conditions, the pH sensitivity of TASK2 may be under selection to ensure  
373 continued HCO<sub>3</sub><sup>-</sup> uptake, however, empirical work is needed to validate this hypothesized  
374 mechanism.

375 The results of this analysis are sensitive to false negatives as the stringent cutoff of  $q <$   
376 0.001 may not identify loci that are truly under selection. For example, carbonic anhydrase  
377 (SPU\_012518) appears to be responding to pH 7.5 where 3/12 variants have  $P$ -values  $< 0.01$ ,  
378 two of which change amino acid sequence and are in linkage disequilibrium. This gene catalyzes  
379 the hydration of CO<sub>2</sub> to bicarbonate [62] and is responsive to experimental acidification in many  
380 organisms including purple sea urchin [25,51], corals [63], anemones [64], mussels [65], oysters  
381 [66], and giant kelp [67], making it an ideal candidate for adaptation despite not meeting the  
382 significance threshold. This protein, and potentially many others that are not statistically

383 significant, likely plays an important role in low pH adaptation and is worthy of future functional  
384 investigations.

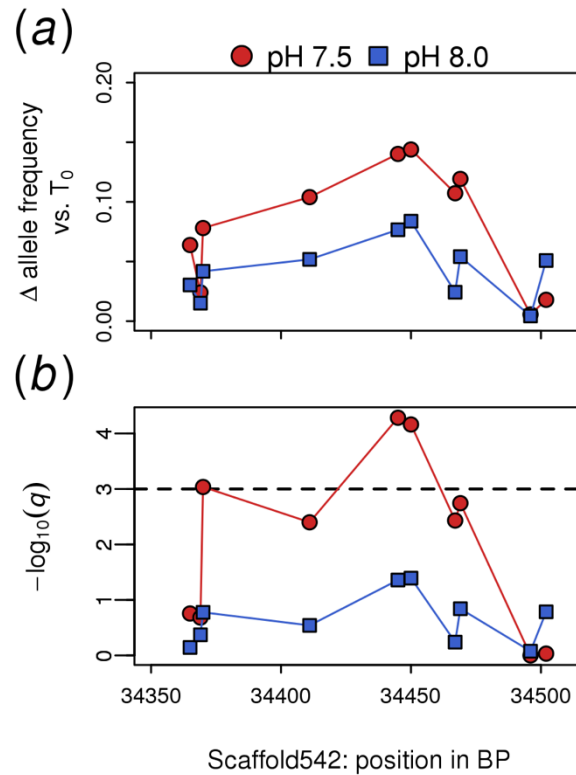

**Figure 5:** (a) Mean change in allele frequency of pH treatments relative to  $T_0$  across a ~150 bp region of scaffold 542 that is ~8kb upstream of the  $K^+$  transporter TASK2. (b)  $q$ -values corresponding to the allele frequency changes in (a). The dashed horizontal line indicates the significance threshold of 0.001.

385

## 386 Conclusion

387 We utilize a single generation selection experiment using an outbred, genetically diverse,  
388 highly fecund species to reveal loci responding to extreme and moderate low pH selection. The  
389 low variation among replicates, decreased decay of LD among selected loci, and enrichment for  
390 biological functions related to pH adaptation suggest that this approach accurately identifies  
391 adaptive loci. Further, we demonstrate how patterns of starting allele frequency can be used to  
392 infer the mechanisms underlying maintenance of adaptive standing genetic variation. This work  
393 provides a framework for future studies assessing the genetic basis of adaptive responses to  
394 climate change. Increasing the temporal sampling through development would reveal how  
395 different life stages differentially respond to selection, while functional studies on top candidates



396 will help to validate their mechanistic and evolutionary significance. Additionally, inter-  
397 population studies will provide insight into how the adaptive potential may differ geographically  
398 and be used to inform models to predict species level responses to climate change. Together, the  
399 results presented here show that *S. purpuratus* possesses genetic variation that is responsive to  
400 extreme low pH conditions and argues that rare genetic variation will be disproportionately  
401 important for surviving future extreme conditions. Taken together, these results suggest an  
402 important warning, given the low starting allele frequency and strength of selection, as evidenced  
403 by the sweep patterns of linkage disequilibrium, selection by extreme events could result in a  
404 major loss of standing genetic variation that could be important for response to other biotic or  
405 abiotic stressors.

406

#### 407 **Data and code availability**

408 Sequence data is available at the National Center for Biotechnology Information (NCBI SRA  
409 BioProject: PRJNA479817). Phenotype data is available as part of the supplementary material.  
410 All code for analysis is available at [https://github.com/PespeniLab/urchin\\_sel\\_ms\\_2018](https://github.com/PespeniLab/urchin_sel_ms_2018).

411

#### 412 **Competing Interests**

413 We have no competing interests.

414

#### 415 **Author Contributions**

416 RB analyzed data and wrote the manuscript. AG designed and conducted the experiment and  
417 assisted with data analysis and drafting the manuscript. KH helped perform the experiment and  
418 analyzed the morphometric data. HH helped design aquaculture facilities and pilot the  
419 experiment. MP designed the experiment and wrote the manuscript.

420

#### 421 **Acknowledgements**

422 We thank Pete Halmay and Patrick Leahy for urchin collections. Jeremy Arenos for assistance  
423 with imaging and image analysis, Jason Hodin and Justin McAlister for helpful discussions on  
424 urchin larval culture, Lauren Ashlock for assistance with conducting the experiment, Mike  
425 Austin and the Vermont Advanced Computing Core for server maintenance, and all members of  
426 the Pespeni lab and Stephen Keller for helpful discussions.

427

## 428 **Funding**

429 This work was supported in part by the National Science Foundation (NSF) grant OCE-1559075  
430 (to M.H.P.). AG was supported by the NSF Graduate Research Fellowship Program DGE-  
431 1451866.

432

## 433 **References**

- 434 1. Pimm, S. L., Jenkins, C. N., Abell, R., Brooks, T. M., Gittleman, J. L., Joppa, L. N.,  
435 Raven, P. H., Roberts, C. M. & Sexton, J. O. 2014 The biodiversity of species and  
436 their rates of extinction, distribution, and protection. *Science* **344**, 1246752–  
437 1246752. (doi:10.1126/science.1246752)
- 438 2. Rahmstorf, S. & Coumou, D. 2011 Increase of extreme events in a warming world.  
439 *Proc. Natl. Acad. Sci.* **108**, 17905–17909. (doi:10.1073/pnas.1101766108)
- 440 3. Hoffmann, A. A. & Sgrò, C. M. 2011 Climate change and evolutionary adaptation.  
441 *Nature* **470**, 479–485. (doi:10.1038/nature09670)
- 442 4. Denny, M. W. & Dowd, W. W. 2012 Biophysics, environmental stochasticity, and  
443 the evolution of thermal safety margins in intertidal limpets. *J. Exp. Biol.* **215**, 934–  
444 947. (doi:10.1242/jeb.058958)
- 445 5. Harley, C. D. G. & Paine, R. T. 2009 Contingencies and compounded rare  
446 perturbations dictate sudden distributional shifts during periods of gradual climate  
447 change. *Proc. Natl. Acad. Sci.* **106**, 11172–11176. (doi:10.1073/pnas.0904946106)
- 448 6. Lande, R. 2009 Adaptation to an extraordinary environment by evolution of  
449 phenotypic plasticity and genetic assimilation. *J. Evol. Biol.* **22**, 1435–1446.  
450 (doi:10.1111/j.1420-9101.2009.01754.x)
- 451 7. Grant, P. R., Grant, B. R., Huey, R. B., Johnson, M. T. J., Knoll, A. H. & Schmitt, J.  
452 2017 Evolution caused by extreme events. *Philos. Trans. Royal Soc. B* **372**,  
453 20160146. (doi:10.1098/rstb.2016.0146)
- 454 8. Kofler, R. & Schlotterer, C. 2014 A guide for the design of evolve and resequencing  
455 studies. *Mol. Biol. Evol.* **31**, 474–483. (doi:10.1093/molbev/mst221)
- 456 9. Burghardt, L. T., Epstein, B., Guhlin, J., Nelson, M. S., Taylor, M. R., Young, N.  
457 D., Sadowsky, M. J. & Tiffin, P. 2018 Select and resequence reveals relative fitness  
458 of bacteria in symbiotic and free-living environments. *Proc. Natl. Acad. Sci.* **115**,  
459 2425–2430. (doi:10.1073/pnas.1714246115)
- 460 10. Schlotterer, C., Kofler, R., Versace, E., Tobler, R. & Franssen, S. U. 2015  
461 Combining experimental evolution with next-generation sequencing: a powerful tool

- 462 to study adaptation from standing genetic variation. *Heredity* **114**, 431–440.  
463 (doi:10.1038/hdy.2014.86)
- 464 11. Franks, S. J. & Hoffmann, A. A. 2012 Genetics of climate change adaptation. *Annu.*  
465 *Rev. Genet.* **46**, 185–208. (doi:10.1146/annurev-genet-110711-155511)
- 466 12. Kessner, D. & Novembre, J. 2015 Power analysis of artificial selection experiments  
467 using efficient whole genome simulation of quantitative traits. *Genetics* **199**, 991–  
468 1005. (doi:10.1534/genetics.115.175075)
- 469 13. Pespeni, M. H. et al. 2013 Evolutionary change during experimental ocean  
470 acidification. *Proc. Natl. Acad. Sci.* **110**, 6937–6942.  
471 (doi:10.1073/pnas.1220673110)
- 472 14. Chan, F. et al. 2017 Persistent spatial structuring of coastal ocean acidification in the  
473 California Current System. *Sci. Rep.* **7**, 2526. (doi:10.1038/s41598-017-02777-y)
- 474 15. Evans, T. G., Pespeni, M. H., Hofmann, G. E., Palumbi, S. R. & Sanford, E. 2017  
475 Transcriptomic responses to seawater acidification among sea urchin populations  
476 inhabiting a natural pH mosaic. *Mol. Ecol.* **26**, 2257–2275. (doi:10.1111/mec.14038)
- 477 16. Hofmann, G. E. et al. 2011 High-frequency dynamics of ocean pH: A multi-  
478 ecosystem comparison. *PLoS ONE* **6**. (doi:10.1371/journal.pone.0028983)
- 479 17. Chevin, L.-M., Lande, R. & Mace, G. M. 2010 Adaptation, plasticity, and extinction  
480 in a changing environment: towards a predictive theory. *PLoS Biol* **8**, e1000357.  
481 (doi:10.1371/journal.pbio.1000357.s001)
- 482 18. Messer, P. W. & Petrov, D. A. 2013 Population genomics of rapid adaptation by soft  
483 selective sweeps. *Trends Ecol. Evol.*, 1–11. (doi:10.1016/j.tree.2013.08.003)
- 484 19. Barrett, R. D. & Schluter, D. 2008 Adaptation from standing genetic variation.  
485 *Trends Ecol. Evol.* **23**, 38–44. (doi:10.1016/j.tree.2007.09.008)
- 486 20. Flowers, J. M., Schroeter, S. C. & Burton, R. S. 2002 The recruitment sweepstakes  
487 has many winners: Genetic evidence from the sea urchin *Strongylocentrotus*  
488 *purpuratus*. *Evolution* **56**, 1445–1453. (doi:10.1111/j.0014-3820.2002.tb01456.x )
- 489 21. Pespeni, M. H. & Palumbi, S. R. 2013 Signals of selection in outlier loci in a widely  
490 dispersing species across an environmental mosaic. *Mol. Ecol.* **22**, 3580–3597.  
491 (doi:10.1111/mec.12337)
- 492 22. Pespeni, M. H., Chan, F., Menge, B. A. & Palumbi, S. R. 2013 Signs of adaptation  
493 to local pH conditions across an environmental mosaic in the California current  
494 ecosystem. *Integrative and Comparative Biology* **53**, 857–870.  
495 (doi:10.1093/icb/ict094)

- 496 23. Kelly, M. W., Padilla-Gamiño, J. L. & Hofmann, G. E. 2013 Natural variation and  
497 the capacity to adapt to ocean acidification in the keystone sea urchin  
498 *Strongylocentrotus purpuratus*. *Glob Change Biol* **19**, 2536–2546.  
499 (doi:10.1111/gcb.12251)
- 500 24. Feely, R. A., Sabine, C. L., Hernandez-Ayon, J. M., Ianson, D. & Hales, B. 2008  
501 Evidence for Upwelling of Corrosive ‘Acidified’ Water onto the Continental Shelf.  
502 *Science* **320**, 1490–1492. (doi:10.1126/science.1155676)
- 503 25. Evans, T. G., Chan, F., Menge, B. A. & Hofmann, G. E. 2013 Transcriptomic  
504 responses to ocean acidification in larval sea urchins from a naturally variable pH  
505 environment. *Mol. Ecol.* **22**, 1609–1625. (doi:10.1111/mec.12188)
- 506 26. R Core Team 2016 *R: A language and environment for statistical computing*.  
507 Vienna, Austria: R Foundation for Statistical Computing.
- 508 27. Bates, D., Mächler, M., Bolker, B. & Walker, S. 2015 Fitting Linear Mixed-Effects  
509 Models Using lme4. *J. Stat. Softw.* **67**, 1–48. (doi:10.18637/jss.v067.i01)
- 510 28. Li, H. 2013 Aligning sequence reads, clone sequences and assembly contigs with  
511 BWA-MEM. *arXiv preprint arXiv:1303.3997*
- 512 29. Schlötterer, C., Tobler, R., Kofler, R. & Nolte, V. 2014 Sequencing pools of  
513 individuals — mining genome-wide polymorphism data without big funding. *Nature*  
514 *Publishing Group* **15**, 749–763. (doi:10.1038/nrg3803)
- 515 30. Storey, J. D. 2002 A direct approach to false discovery rates. *Journal of the Royal*  
516 *Statistical Society: Series B (Statistical Methodology)* **64**, 479–498.  
517 (doi:10.1111/1467-9868.00346)
- 518 31. Tobler, R., Franssen, S. U., Kofler, R., Orozco-terWengel, P., Nolte, V., Hermisson,  
519 J. & Schlötterer, C. 2014 Massive habitat-specific genomic response in *D.*  
520 *melanogaster* populations during experimental evolution in hot and cold  
521 environments. *Mol. Biol. Evol.* **31**, 364–375. (doi:10.1093/molbev/mst205)
- 522 32. Luu, K., Bazin, E. & Blum, M. G. B. 2017 pcadapt: an R package to perform  
523 genome scans for selection based on principal component analysis. *Mol. Ecol.*  
524 *Resour.* **17**, 67–77. (doi:10.1111/1755-0998.12592)
- 525 33. Kofler, R., Orozco-terWengel, P., De Maio, N., Pandey, R. V., Nolte, V., Futschik,  
526 A., Kosiol, C. & Schlötterer, C. 2011 PoPoolation: A toolbox for population genetic  
527 analysis of next generation sequencing data from pooled individuals. *PLoS ONE* **6**,  
528 e15925. (doi:10.1371/journal.pone.0015925)
- 529 34. Feder, A. F., Petrov, D. A. & Bergland, A. O. 2012 LDx: Estimation of linkage  
530 disequilibrium from high-throughput pooled resequencing data. *PLoS ONE* **7**,  
531 e48588. (doi:10.1371/journal.pone.0048588)

- 532 35. Baty, F., Ritz, C., Charles, S., Brutsche, M., Flandrois, J.-P. & Delignette-Muller,  
533 M.-L. 2015 A toolbox for nonlinear regression in R: the package nlstools. *J. Stat.*  
534 *Softw.* **66**, 1–21. (doi:10.18637/jss.v066.i05)
- 535 36. Alexa, A. & Rahnenfuhrer, J. 2010 topGO: enrichment analysis for gene ontology.  
536 **11**, R14. (doi:10.1186/gb-2010-11-2-r14)
- 537 37. Kim, Y. & Nielsen, R. 2004 Linkage disequilibrium as a signature of selective  
538 sweeps. *Genetics* **167**, 1513–1524. (doi:10.1534/genetics.103.025387)
- 539 38. Przeworski, M. 2002 The signature of positive selection at randomly chosen loci.  
540 *Genetics* **160**, 1179–1189.
- 541 39. Hermisson, J. & Pennings, P. S. 2017 Soft sweeps and beyond: understanding the  
542 patterns and probabilities of selection footprints under rapid adaptation. *Methods*  
543 *Ecol Evol* **8**, 700–716. (doi:10.1111/2041-210X.12808)
- 544 40. Hermisson, J. & Pennings, P. S. 2005 Soft sweeps: Molecular population genetics of  
545 adaptation from standing genetic variation. *Genetics* **169**, 2335–2352.  
546 (doi:10.1534/genetics.104.036947)
- 547 41. Turner, T. L. & Miller, P. M. 2012 Investigating natural variation in *Drosophila*  
548 courtship song by the evolve and resequence approach. *Genetics* **191**, 633–642.  
549 (doi:10.1534/genetics.112.139337)
- 550 42. Orozco-terWengel, P., Kapun, M., Nolte, V., Kofler, R., Flatt, T. & Schlötterer, C.  
551 2012 Adaptation of *Drosophila* to a novel laboratory environment reveals  
552 temporally heterogeneous trajectories of selected alleles. *Mol. Ecol.* **21**, 4931–4941.  
553 (doi:10.1111/j.1365-294X.2012.05673.x)
- 554 43. Puritz, J. B. & Lotterhos, K. E. 2018 Expressed exome capture sequencing: A  
555 method for cost-effective exome sequencing for all organisms. *Mol. Ecol. Resour.*  
556 **166**, 1724. (doi:10.1111/1755-0998.12905 )
- 557 44. Anderson, J. T., Lee, C.-R., Rushworth, C. A., Colautti, R. I. & Mitchell-Olds, T.  
558 2012 Genetic trade-offs and conditional neutrality contribute to local adaptation.  
559 *Mol. Ecol.* **22**, 699–708. (doi:10.1111/j.1365-294X.2012.05522.x)
- 560 45. Mitchell-Olds, T., Willis, J. H. & Goldstein, D. B. 2007 Which evolutionary  
561 processes influence natural genetic variation for phenotypic traits? *Nat Rev Genet* **8**,  
562 845–856. (doi:10.1038/nrg2207)
- 563 46. Pespeni, M. H., Oliver, T. A., Manier, M. K. & Palumbi, S. R. 2010 Restriction site  
564 tiling analysis: accurate discovery and quantitative genotyping of genome-wide  
565 polymorphisms using nucleotide arrays. *Genome Biol* **11**, R44. (doi:10.1186/gb-  
566 2010-11-4-r44)

- 567 47. Savolainen, O., Lascoux, M. & Merilä, J. 2013 Ecological genomics of local  
568 adaptation. *Nature Publishing Group* **14**, 807–820. (doi:10.1038/nrg3522)
- 569 48. Charlesworth, D. 2006 Balancing selection and Its effects on sequences in nearby  
570 genome regions. *PLoS Genet* **2**, e64–6. (doi:10.1371/journal.pgen.0020064)
- 571 49. Pan, T. C. F., Applebaum, S. L. & Manahan, D. T. 2015 Experimental ocean  
572 acidification alters the allocation of metabolic energy. *Proc. Natl. Acad. Sci. U.S.A.*  
573 **112**, 4696–4701. (doi:10.1073/pnas.1416967112)
- 574 50. Stumpp, M. et al. 2012 Acidified seawater impacts sea urchin larvae pH regulatory  
575 systems relevant for calcification. *Proc. Natl. Acad. Sci.* **109**, 18192–18197.  
576 (doi:10.1073/pnas.1209174109/)
- 577 51. Todgham, A. E. & Hofmann, G. E. 2009 Transcriptomic response of sea urchin  
578 larvae *Strongylocentrotus purpuratus* to CO<sub>2</sub>-driven seawater acidification. *J. Exp.*  
579 *Biol.* **212**, 2579–2594. (doi:10.1242/jeb.032540)
- 580 52. Suzuki, M., Murakami, T., Cheng, J., Kano, H., Fukata, M. & Fujimoto, T. 2015  
581 ELMOD2 is anchored to lipid droplets by palmitoylation and regulates adipocyte  
582 triglyceride lipase recruitment. *Mol. Biol. Cell* **26**, 2333–2342.  
583 (doi:10.1091/mbc.E14-11-1504)
- 584 53. East, M. P., Bowzard, J. B., Dacks, J. B. & Kahn, R. A. 2012 ELMO  
585 domains, evolutionary and functional characterization of a novel GTPase-activating  
586 protein (GAP) domain for Arf protein family GTPases. *J. Biol. Chem.* **287**, –39553.  
587 (doi:10.1074/jbc.M112.417477)
- 588 54. Ivanova, A. A., East, M. P., Yi, S. L. & Kahn, R. A. 2014 Characterization of  
589 recombinant ELMOD (cell engulfment and motility domain) proteins as GTPase-  
590 activating proteins (GAPs) for ARF family GTPases. *J. Biol. Chem.* **289**, 11111–  
591 11121. (doi:10.1074/jbc.M114.548529)
- 592 55. Geiger, B., Spatz, J. P. & Bershadsky, A. D. 2009 Environmental sensing through  
593 focal adhesions. *Nat Rev Mol Cell Biol* **10**, 21–33. (doi:10.1038/nrm2593)
- 594 56. Burridge, K. & Chrzanowska-Wodnicka, M. 1996 Focal adhesions, contractility, and  
595 signaling. *Annu. Rev. Cell Dev. Biol.* **12**, 463–518.  
596 (doi:10.1146/annurev.cellbio.12.1.463)
- 597 57. Tomanek, L. 2014 Proteomics to study adaptations in marine organisms to  
598 environmental stress. *J Proteomics* **105**, 92–106. (doi:10.1016/j.jprot.2014.04.009)
- 599 58. Goncalves, P., Thompson, E. L. & Raftos, D. A. 2017 Contrasting impacts of ocean  
600 acidification and warming on the molecular responses of CO<sub>2</sub>-resilient oysters. 1–  
601 15. (doi:10.1186/s12864-017-3818-z)



- 602 59. Kane, P. M. 2006 The where, when, and how of organelle acidification by the yeast  
603 vacuolar H<sup>+</sup>-ATPase. *Microbiology and Molecular Biology Reviews* **70**, 177–191.  
604 (doi:10.1128/MMBR.70.1.177-191.2006)
- 605 60. Reyes, R., Duprat, F., Lesage, F., Fink, M., Salinas, M., Farman, N. & Lazdunski,  
606 M. 1998 Cloning and expression of a novel pH-sensitive two pore domain K<sup>+</sup>  
607 channel from human kidney. *J. Biol. Chem.* **273**, 30863–30869.  
608 (doi:10.1074/jbc.273.47.30863)
- 609 61. Warth, R. et al. 2004 Proximal renal tubular acidosis in TASK2 K<sup>+</sup> channel-  
610 deficient mice reveals a mechanism for stabilizing bicarbonate transport. *Proc. Natl.*  
611 *Acad. Sci.* **101**, 8215–8220. (doi:10.1073/pnas.0400081101)
- 612 62. Lindskog, S. 1997 Structure and mechanism of carbonic anhydrase. *Pharmacol.*  
613 *Ther.* **74**, 1–20. (doi:10.1016/S0163-7258(96)00198-2)
- 614 63. Zoccola, D., Innocenti, A., Bertucci, A., Tambutté, E., Supuran, C. & Tambutté, S.  
615 2016 Coral carbonic anhydrases: Regulation by ocean acidification. *Marine Drugs*  
616 **14**, 109–111. (doi:10.3390/md14060109)
- 617 64. Ventura, P., Jarrold, M. D., Merle, P.-L., Barnay-Verdier, S., Zamoum, T., Rodolfo-  
618 Metalpa, R., Calosi, P. & Furla, P. 2016 Resilience to ocean acidification: decreased  
619 carbonic anhydrase activity in sea anemones under high pCO<sub>2</sub> conditions. *Mar.*  
620 *Ecol. Prog. Ser.* **559**, 257–263. (doi:10.3354/meps11916)
- 621 65. Fitzner, S. C., Phoenix, V. R., Cusack, M. & Kamenos, N. A. 2014 Ocean  
622 acidification impacts mussel control on biomineralisation. *Sci. Rep.* **4**, 6218.  
623 (doi:10.1038/srep06218)
- 624 66. Wang, X., Wang, M., Jia, Z., Qiu, L., Wang, L., Zhang, A. & Song, L. 2017 A  
625 carbonic anhydrase serves as an important acid-base regulator in pacific oyster  
626 *Crassostrea gigas* exposed to elevated CO<sub>2</sub>: implication for physiological responses  
627 of mollusk to ocean acidification. *Mar Biotechnol* **19**, 22–35. (doi:10.1007/s10126-  
628 017-9734-z)
- 629 67. Fernández, P. A., Roleda, M. Y. & Hurd, C. L. 2015 Effects of ocean acidification  
630 on the photosynthetic performance, carbonic anhydrase activity and growth of the  
631 giant kelp *Macrocystis pyrifera*. *Photosynthesis Research*, 1–13.  
632 (doi:10.1007/s11120-015-0138-5)

633

#### 634 **Figure legends:**

635 **Figure 1:** Morphometric analysis of total larval body length. (a) Boxplot of body size in each  
636 selection regime. Inset pictures show representative individuals found in pH 8.0 (b) and 7.5 (c).

637

638 **Figure 2:** Principal component analysis of allele frequencies for all 75,368 SNPs at time point  
639 zero ( $T_0$ ) and after seven days in the two the pH treatments.

640

641 **Figure 3:** Decay in linkage disequilibrium with physical distance between SNP pairs. Dashed  
642 lines are neutral loci and solid red and blue lines represent decay in pH 7.5 and 8.0 selected  
643 variants, respectively. Solid grey shading is the 95% distribution of 500 permutations of down  
644 sampled random variants across the genome (see text for details).

645

646 **Figure 4:** (a) Mean change in allele frequency for variants showing significant shifts under pH  
647 7.5 and 8.0. Dashed black line represents the 1:1 expectation. (b) Allele frequency at  $T_0$   
648 polarized by the allele increasing in frequency during selection. Colored solid lines are the  
649 density plot distributions for each set of selected loci. The solid black line represents the median  
650 expectation of neutral loci from 1000 permutations of down sampling to the same number of  
651 variants as selected loci; grey shading is the 95% distribution of the permutation. Dashed vertical  
652 lines are the mean allele frequencies of each set of variants.

653

654 **Figure 5:** (a) Mean change in allele frequency of pH treatments relative to  $T_0$  across a ~150 bp  
655 region of scaffold 542 that is ~8kb upstream of the  $K^+$  transporter TASK2. (b)  $q$ -values  
656 corresponding to the allele frequency changes in (a). The dashed horizontal line indicates the  
657 significance threshold of 0.001.
